# Supplementary material
Source: PubMed Central journal article supplement (PMC10323233)
Supplement: develop-150-201552-s1.pdf [file develop-150-201552-s1.pdf]

**Fig. S1. HBCs at 24 hpi demonstrate increased Notch signaling pathway activity.** A-D: Relative to their counterparts within uninj. OE (A), HBCs at 24 hpi (B) increase Notch signaling pathway activity given their increase in nuclear NICD. Expression of NICD within HBC nuclei demarcated in blue (C, D) is that of CK5<sup>+</sup> HBCs illustrated in their respective conditions (A, B). E: Quantification of HBC nuclear NICD norm. fluor. density, each point represents a CK5<sup>+</sup> Nuclear Object (Obj.) (as represented by blue outlines in C and D) (n = 3 mice; 1,159 Uninj. HBCs and 1,037 24 hpi HBCs). Uninj. used as baseline, error bars indicate mean  $\pm$  s.e.m., Mann-Whitney test, \*\*\*\*p<0.0001 (E). Scale bar equals 25  $\mu$ m (A).

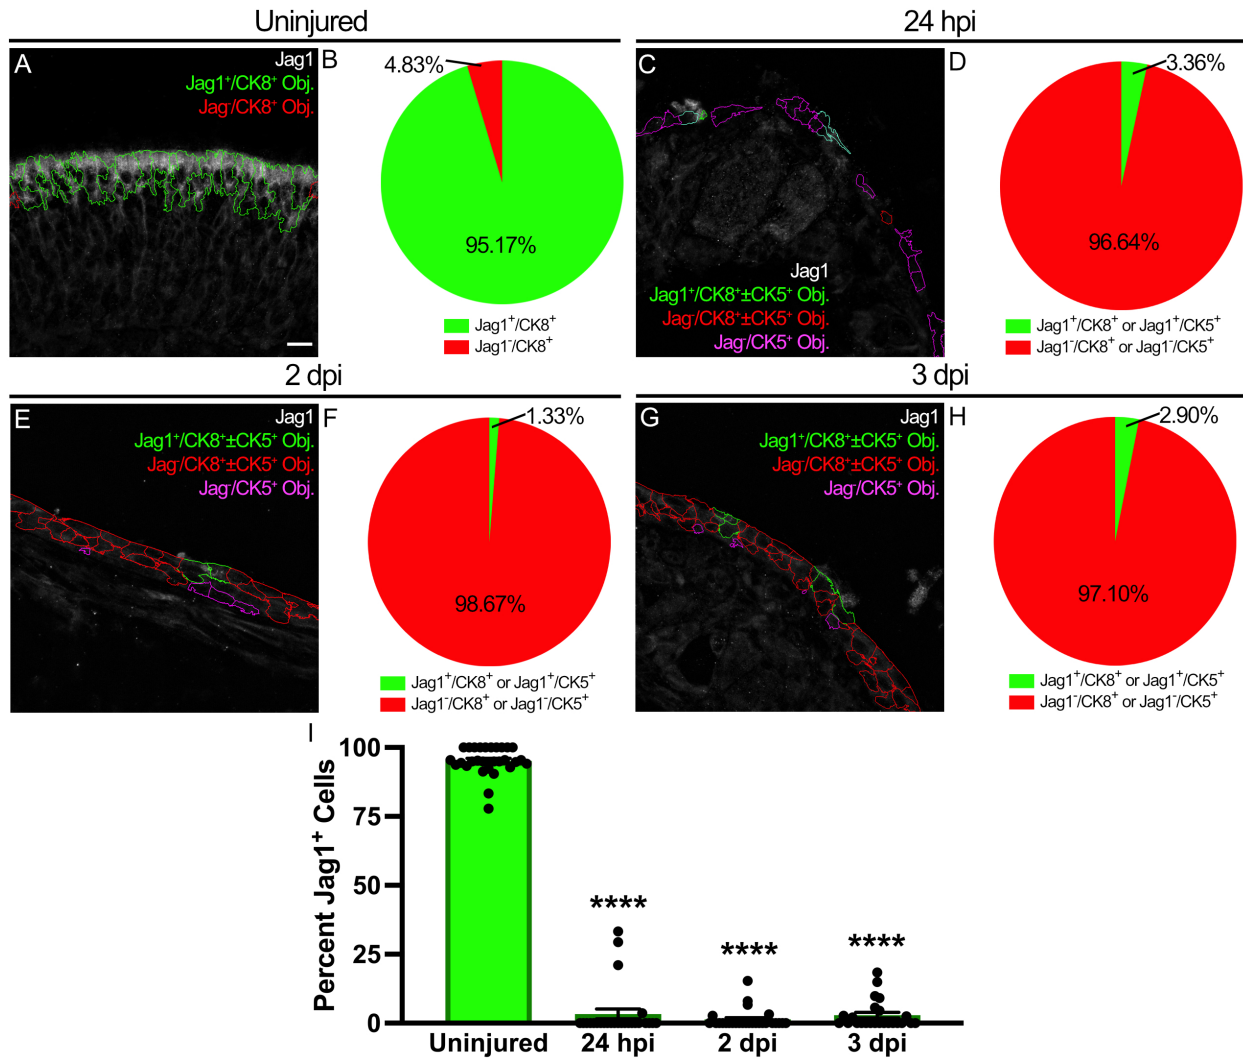

**Fig. S2. Jagged1 expression is negligible during early OE regeneration.** A, B: Jagged1 is highly expressed within the uninjured OE and localizes to CK8<sup>+</sup> Sus cells. C-H: As regeneration proceeds from 24 hpi (C, D), 2 dpi (E, F), and 3 dpi (G, H), scant CK5<sup>+</sup> and CK8<sup>+</sup> cells that compose the regenerating OE are Jagged1<sup>+</sup>. I: Each point represents an analyzed region as represented in A, C, E, and G (n = 3 mice, 517 Uninjured CK8<sup>+</sup> cells across 29 regions, 583 24 hpi CK8<sup>+</sup> or CK5<sup>+</sup> cells across 26 regions, 988 2 dpi CK8<sup>+</sup> or CK5<sup>+</sup> cells across 27 regions, and 1,102 3 dpi CK8<sup>+</sup> or CK5<sup>+</sup> cells across 24 regions), error bars indicate mean ± s.e.m., Kruskal-Wallis test with post-hoc Dunn's multiple comparisons test, \*\*\*\*p<0.0001. Scale bar equals 10 μm (A).

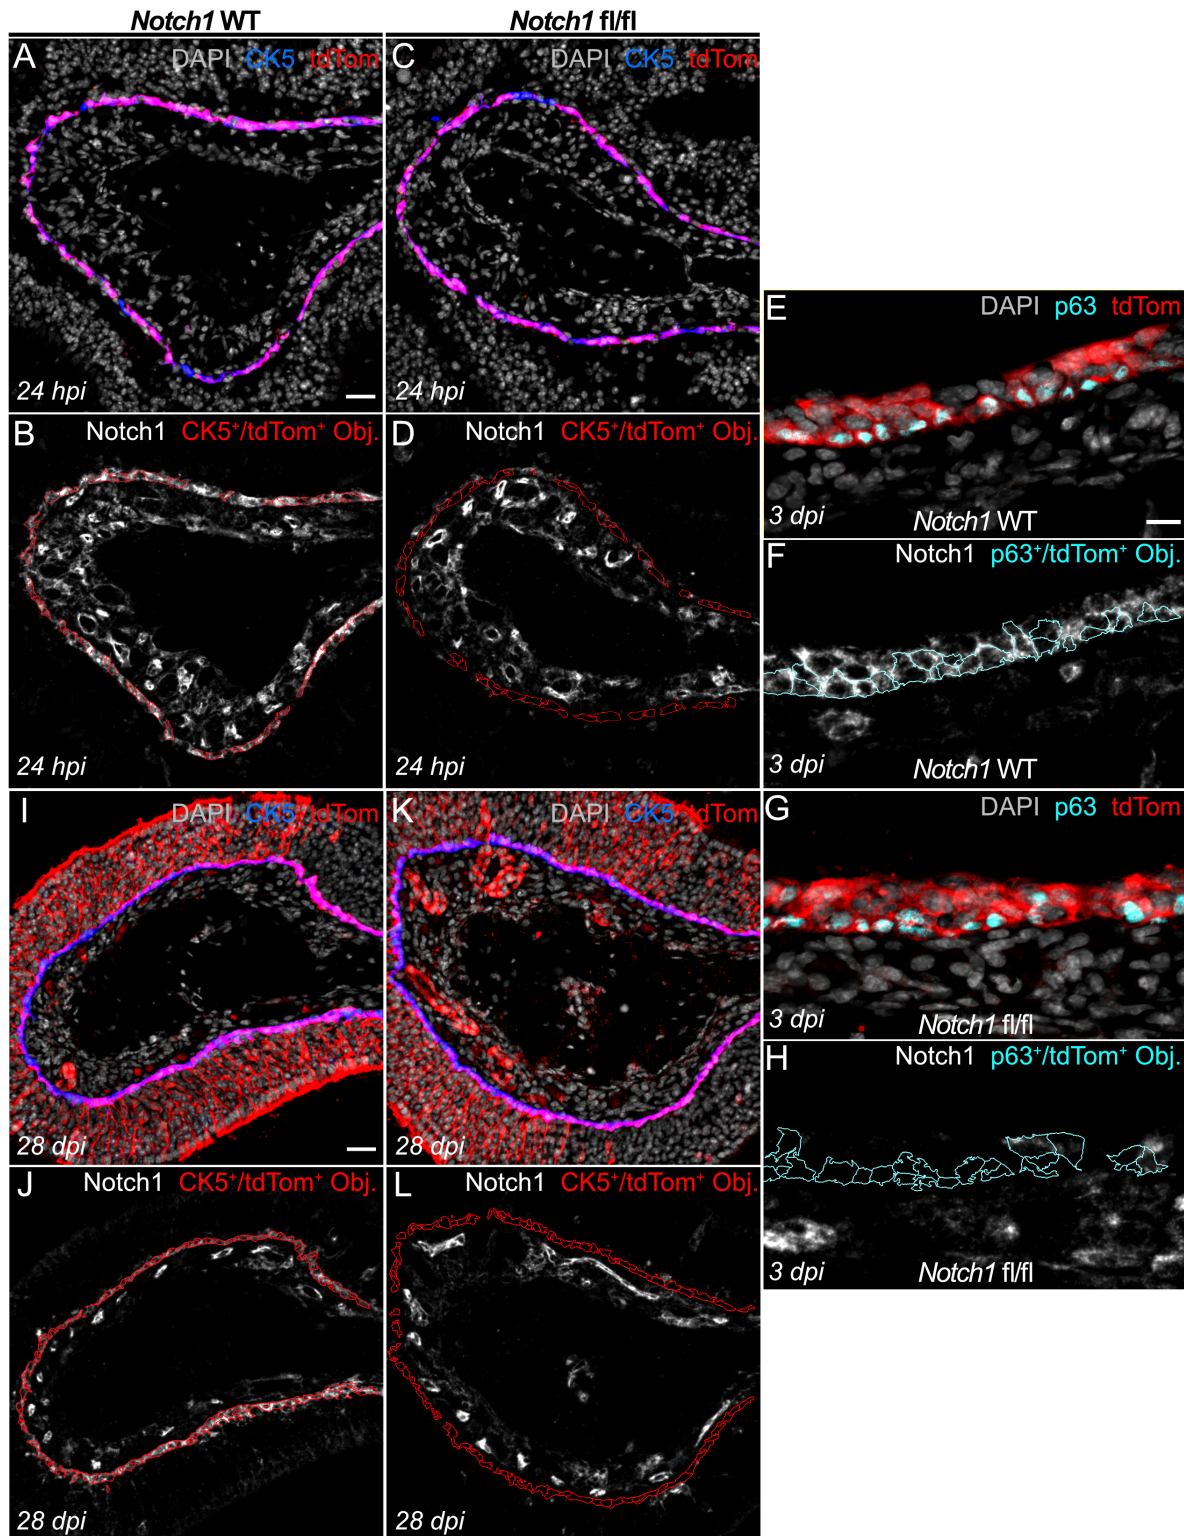

**Fig. S3. *Notch1* cKO at various stages of OE regeneration.** Images representing the effect of tamoxifen-induced recombination on *Notch1* expression within *tdTom*<sup>+</sup> HBCs (red outlines, B, D, J, and L; cyan outlines, F and H) at 24 hpi (A-D), 3 dpi (E-H), and 28 dpi (I-L). Scale bars equal 25  $\mu$ m (A, I) and 10  $\mu$ m (E).

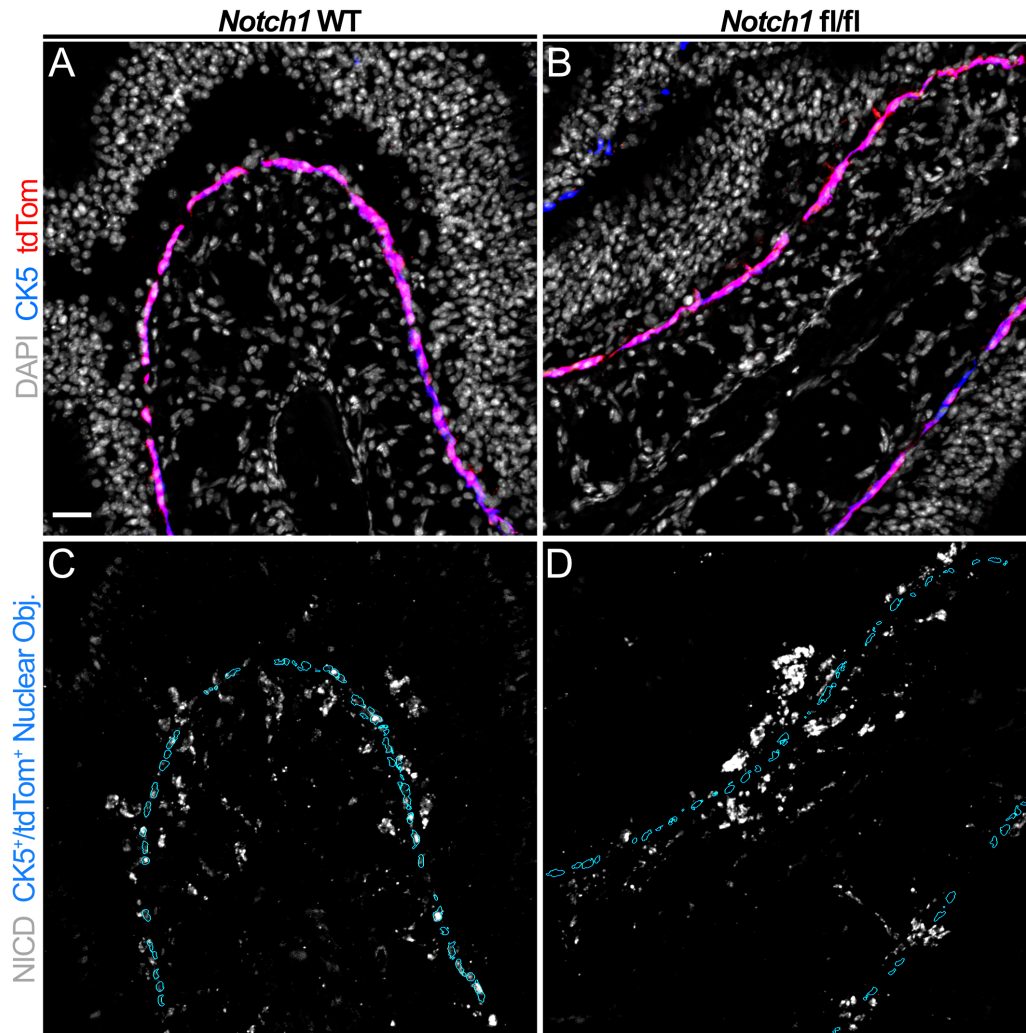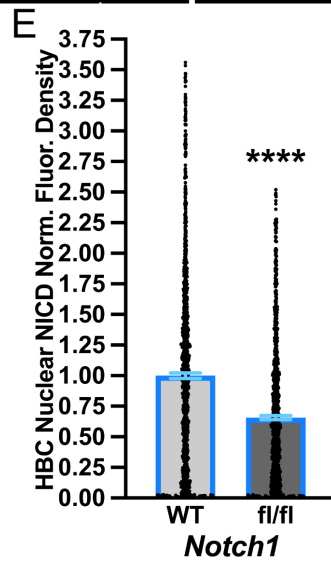

**Fig. S4. Notch signaling pathway activity at 24 hpi is attenuated by HBC-specific *Notch1* cKO.** A-D: Relative to those within *Notch1* WT OE (A), HBCs at 24 hpi within *Notch1* fl/fl OE (B) demonstrate diminished Notch signaling activity as evidenced by decreased nuclear NICD (within blue outlines, C and D). E: Quantification of HBC nuclear NICD norm. fluor. density, each point represents a tdTom<sup>+</sup> Nuclear Obj. (as represented by blue outlines in C and D) (n = 3 mice, 1,280 *Notch1* WT HBCs and 1,157 *Notch1* fl/fl HBCs). Error bars indicate mean  $\pm$  s.e.m., Mann-Whitney test, \*\*\*\*p<0.0001 (E). Scale bar equals 25  $\mu$ m (A).

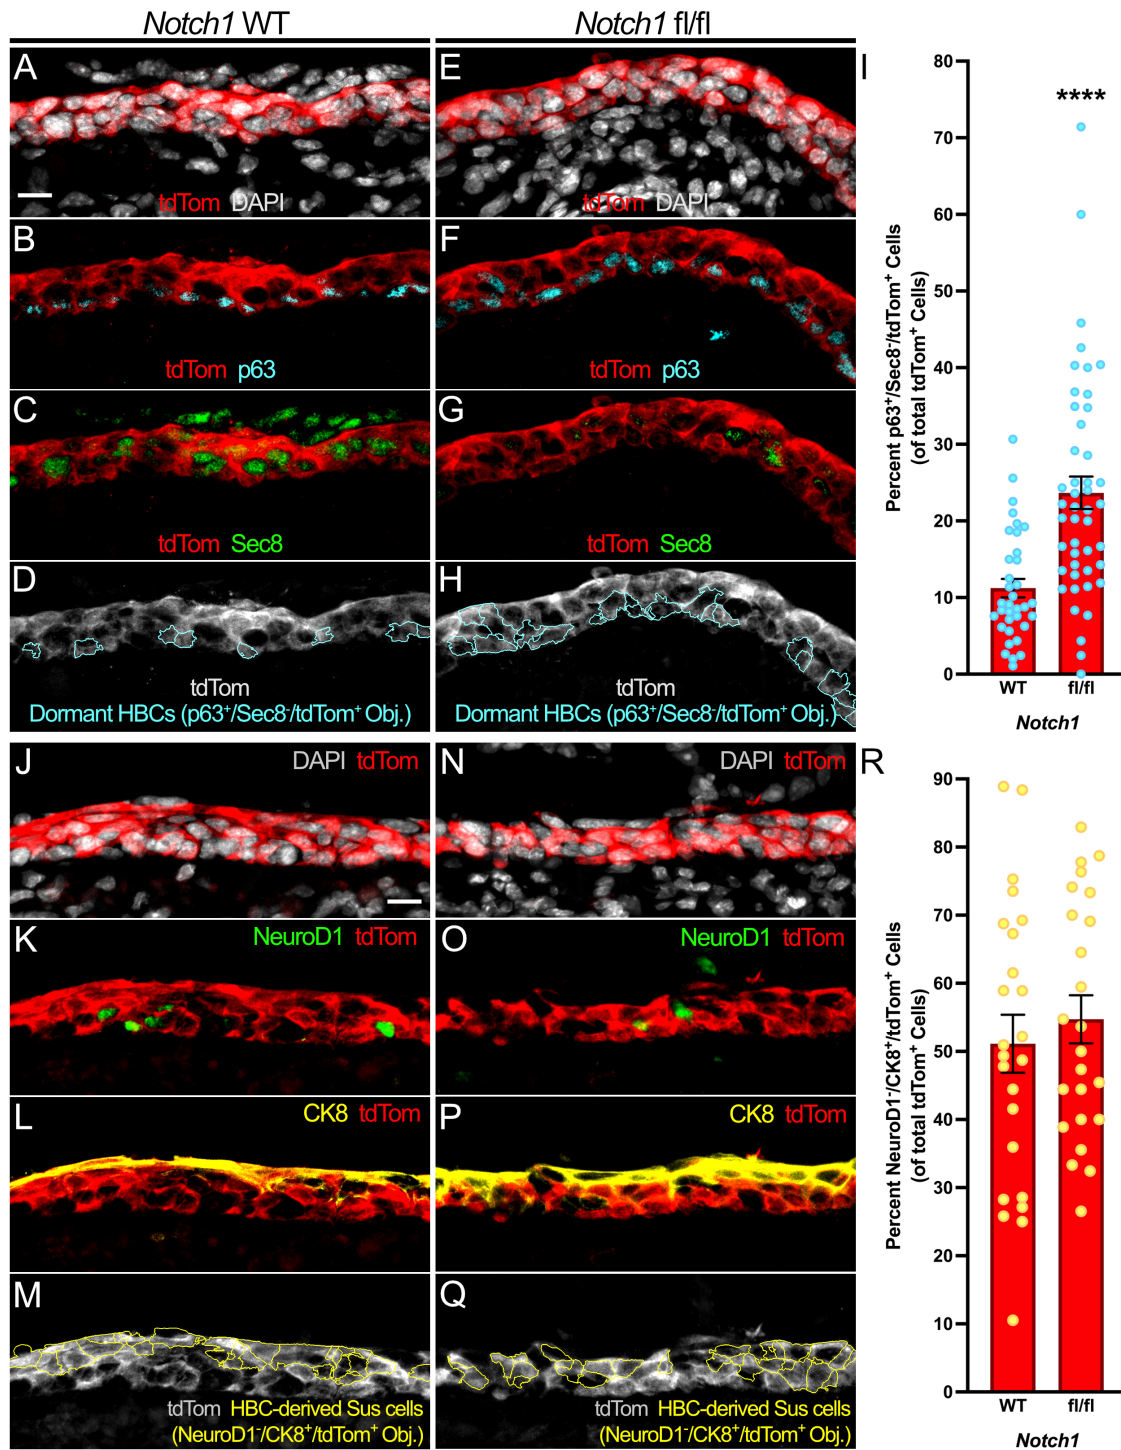

**Fig. S5. *Notch1* cKO increases proportion of dormant HBCs but does not affect Sus cell composition of the regenerating OE at 3 dpi.** A-H: Relative to control (A-D), the proportion of dormant HBCs (cyan outlines, D and H) amongst all HBC-derived cells within the regenerating OE at 3 dpi decreases following HBC-specific *Notch1* cKO (E-H). I: Each circle represents an analyzed region as represented in D and H (n=3 mice, 35 *Notch1* WT regions and 46 *Notch1* fl/fl regions). J-Q: Relative to control (J-M), the proportion of HBCs that differentiate into NeuroD1<sup>+</sup>/CK8<sup>+</sup>/tdTom<sup>+</sup> Sus cells (yellow

outlines, M and Q) within the regenerating OE at 3 dpi does not significantly change following HBC-specific *Notch1* cKO (N-Q). R: Each circle represents an analyzed region as represented in M and Q (n = 3 mice, 24 *Notch1* WT regions and 24 *Notch1* fl/fl regions). Mann-Whitney test (I), unpaired t-test (R). Error bars indicate mean  $\pm$  s.e.m., \*\*\*\*p<0.0001 (I, R). Scale bar equals 10  $\mu$ m (A).



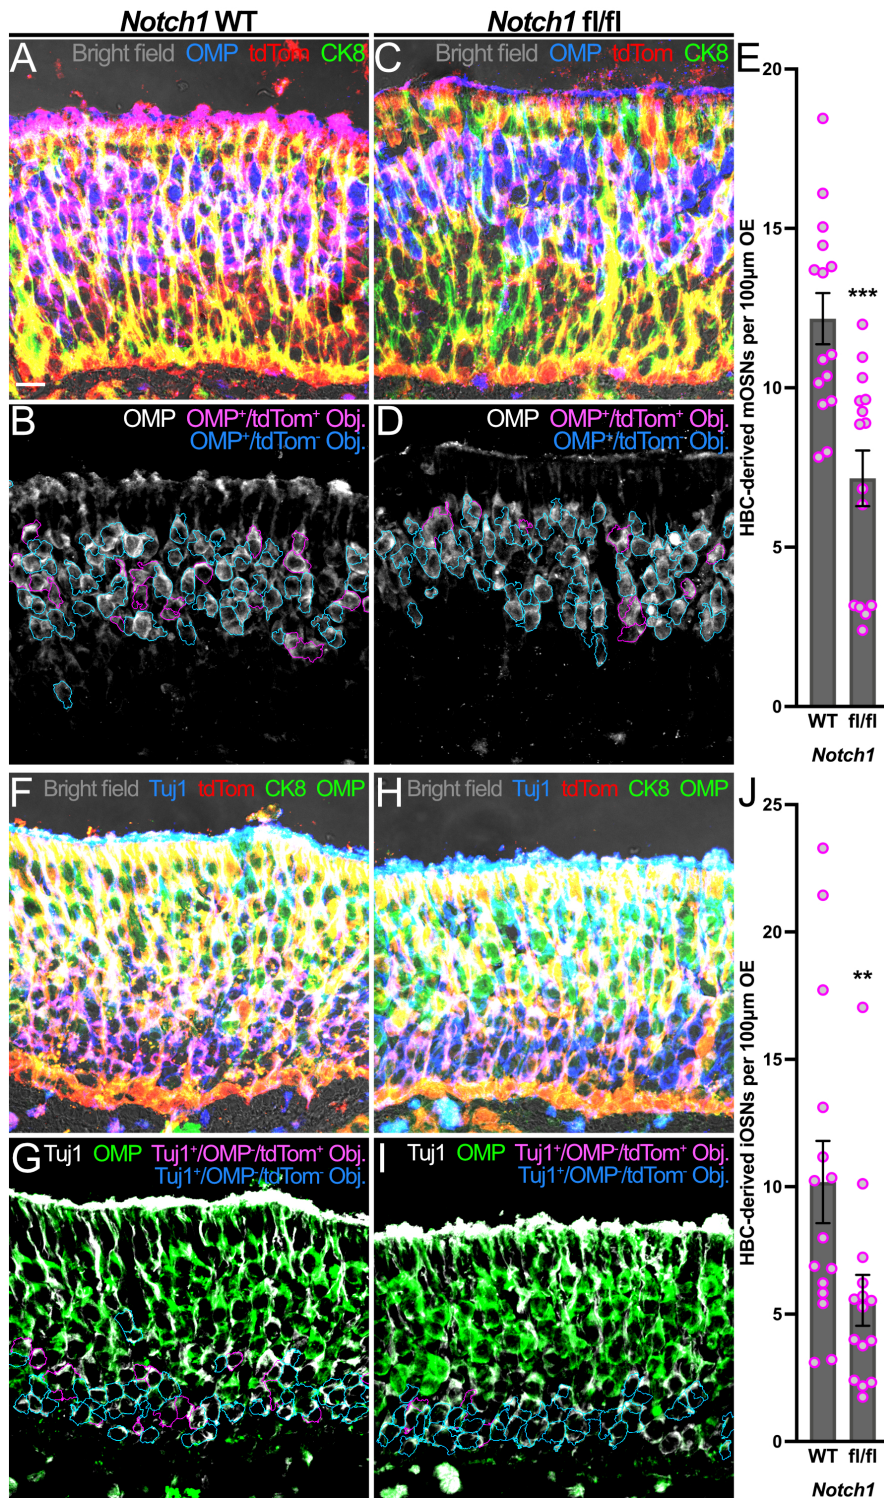

**Fig. S6. HBC differentiation into mOSNs and iOSNs following OE injury is attenuated by *Notch1* cKO.** A-D: Relative to control (A, B), fewer HBC-derived OMP<sup>+</sup>/tdTom<sup>+</sup> mOSNs (magenta in A and C; magenta outlines in B and D) constitute the morphologically regenerated OE at 28 dpi following HBC-specific *Notch1* cKO (C, D). E: Each circle represents an analyzed region as represented in B and D (n = 3 mice, 15 *Notch1* WT regions and 15 *Notch1* fl/fl regions). F-I: HBC differentiation into Tuj1<sup>+</sup>/OMP<sup>-</sup>

/tdTom<sup>+</sup> iOSNs (magenta in F and H; magenta outlines in G and I) decreases at 28 dpi following following HBC-specific *Notch1* cKO (H, I). J: Each circle represents an analyzed region as represented in G and I (n = 3 mice, 15 *Notch1* WT regions and 15 *Notch1* fl/fl regions). Error bars indicate mean ± s.e.m., Mann-Whitney test, \*\*p<0.01, \*\*\*p<0.001 (E, J). Scale bar equals 10 μm (A).

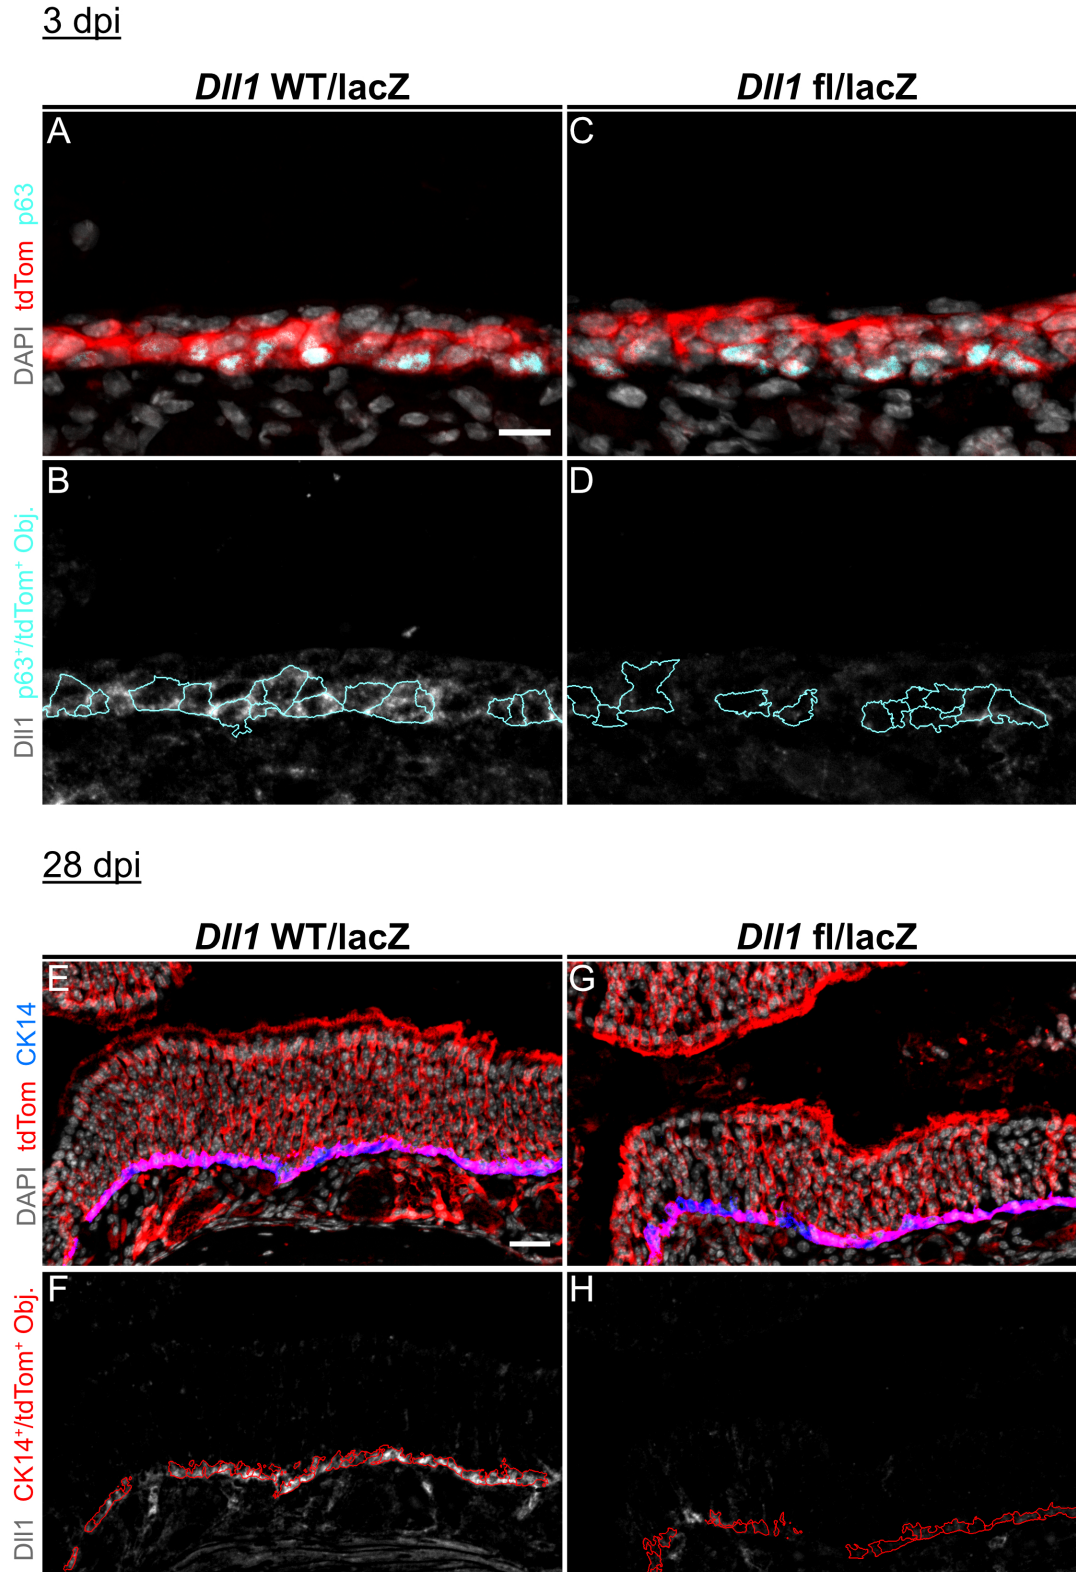

**Fig. S7. *Dll1* cKO at various stages of OE regeneration.** Images representing the effect of tamoxifen-induced recombination on *Dll1* expression within tdTom<sup>+</sup> HBCs (cyan outlines in B and D; red outlines in F and H) at 3 dpi (A-D) and 28 dpi (E-H). Scale bar equals 10  $\mu$ m (A) and 25  $\mu$ m (E).

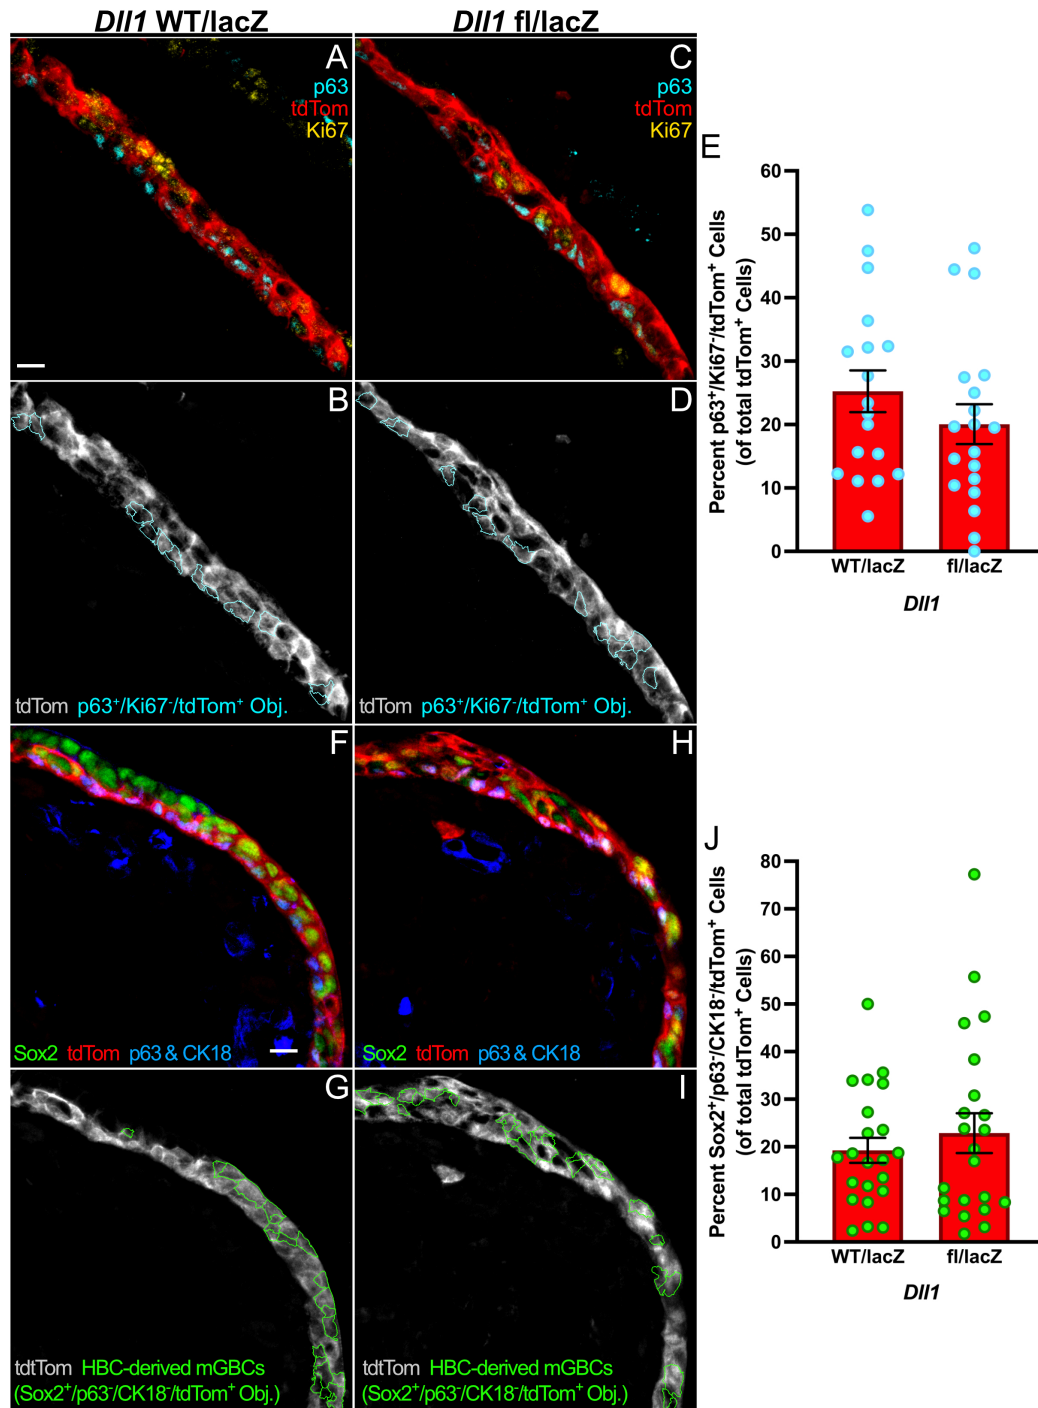

**Fig. S8. HBC quiescence and differentiation into mGBCs at 3 dpi is not affected by complete *Dll1* KO.** A-D: Relative to control (A, B), the percentage of quiescent HBCs (cyan outlines, B and D) within the regenerating OE at 3 dpi does not significantly change following HBC-specific complete *Dll1* KO (C, D). E: Each circle represents an analyzed region as represented in B and D (n = 3 mice, 18 *Dll1* WT/lacZ regions and 19 *Dll1* fl/lacZ regions). F-I: Relative to control (F, G), the percentage of HBCs that differentiate into Sox2<sup>+</sup>/p63<sup>+</sup>/CK18<sup>+</sup>/tdTom<sup>+</sup> mGBCs (green outlines, G and I) within the regenerating OE at 3 dpi does not significantly change following HBC-specific complete *Dll1* KO (H, I). J: Each circle

represents an analyzed region as represented in G and I (n = 3 mice, 22 *Dll1* WT/*lacZ* regions and 22 *Dll1* fl/*lacZ* regions). Unpaired t-test (E), Mann-Whitney test (J). Error bars indicate mean  $\pm$  s.e.m. (E, J). Scale bar equals 10  $\mu$ m (A).

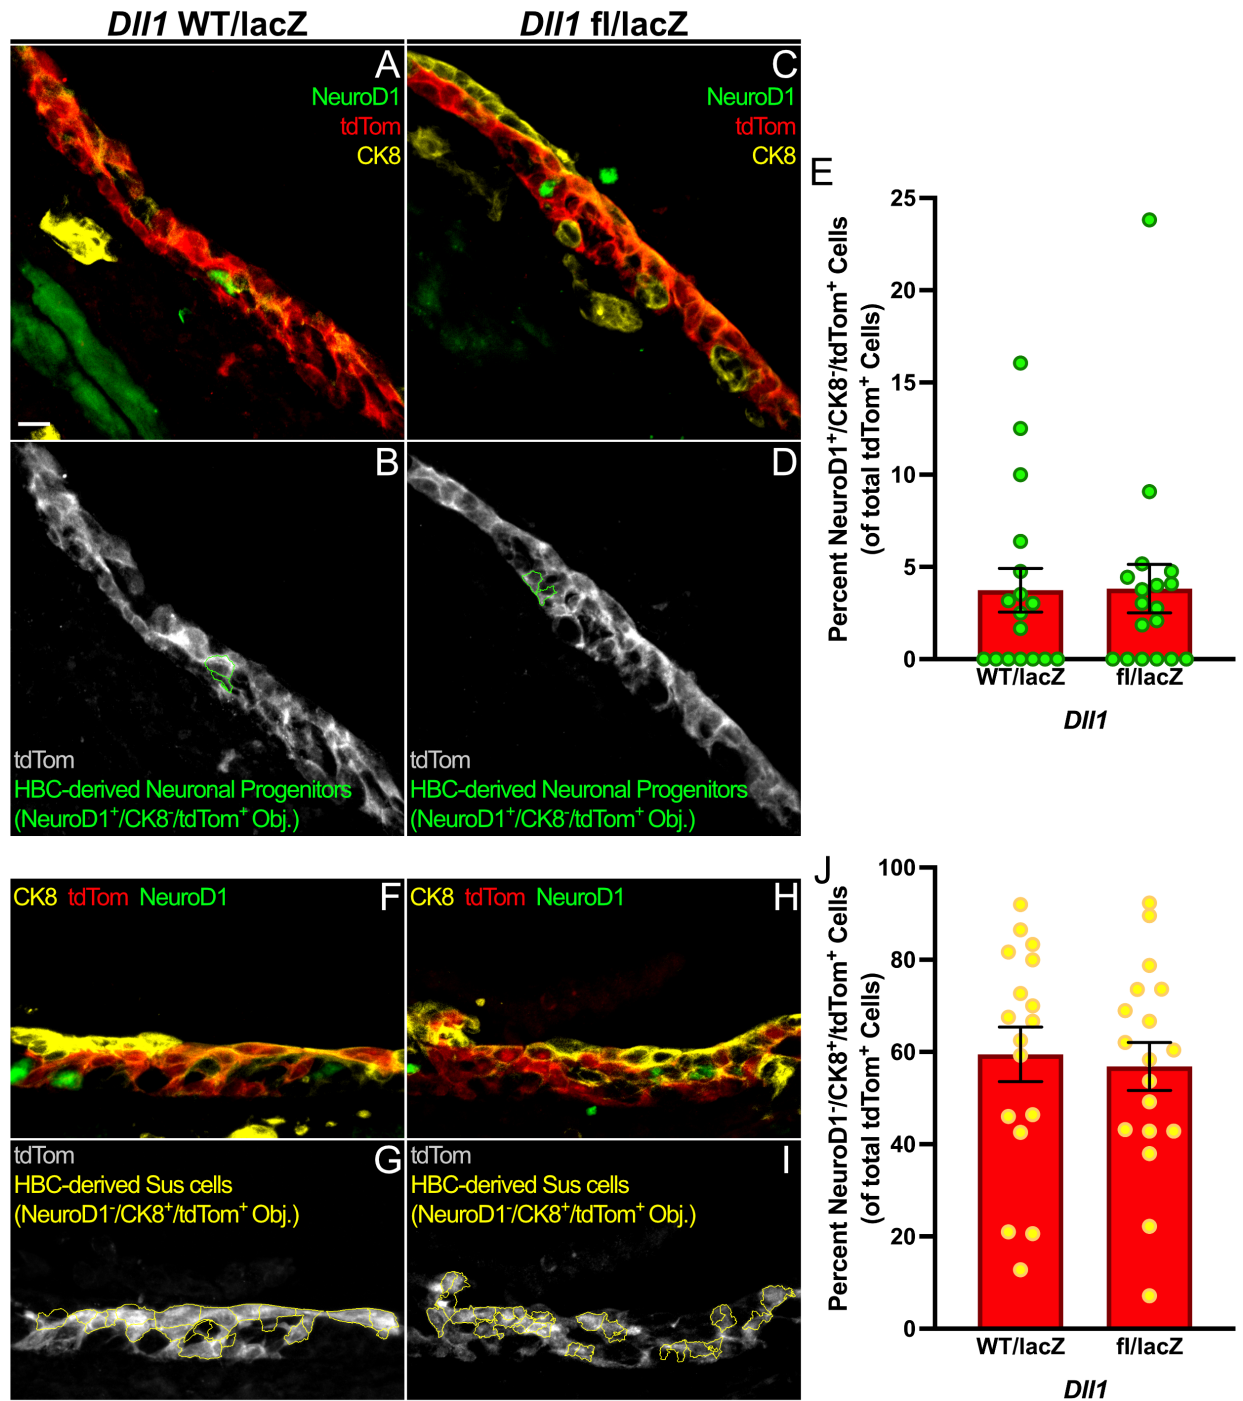

**Fig. S9. HBC differentiation into neuronal progenitors and Sus cells at 3 dpi is not affected by complete *Dll1* KO.** A-D: Relative to control (A, B), the percentage of HBCs that differentiate into NeuroD1<sup>+</sup>/CK8<sup>+</sup>/tdTom<sup>+</sup> neuronal progenitors (green<sup>+</sup> outlines, B and D) within the regenerating OE at 3 dpi does not significantly change following HBC-specific complete *Dll1* KO (C, D). E: Each circle represents an analyzed region as represented in B and D (n = 3 mice, 17 *Dll1* WT/lacZ regions and 18 *Dll1* fl/lacZ regions). F-I: Relative to control (F, G), the percentage of HBCs that differentiate into

NeuroD1/CK8<sup>+</sup>/tdTom<sup>+</sup> Sus cells (yellow outlines, G and I) within the regenerating OE at 3 dpi does not significantly change following HBC-specific complete *Dll1* KO (H, I). J: Each circle represents an analyzed region as represented in G and I (n = 3 mice, 17 *Dll1* WT/lacZ regions and 18 *Dll1* fl/lacZ regions). Mann-Whitney test (E), unpaired t-test (J). Error bars indicate mean  $\pm$  s.e.m. (E, J). Scale bar equals 10  $\mu$ m (A).

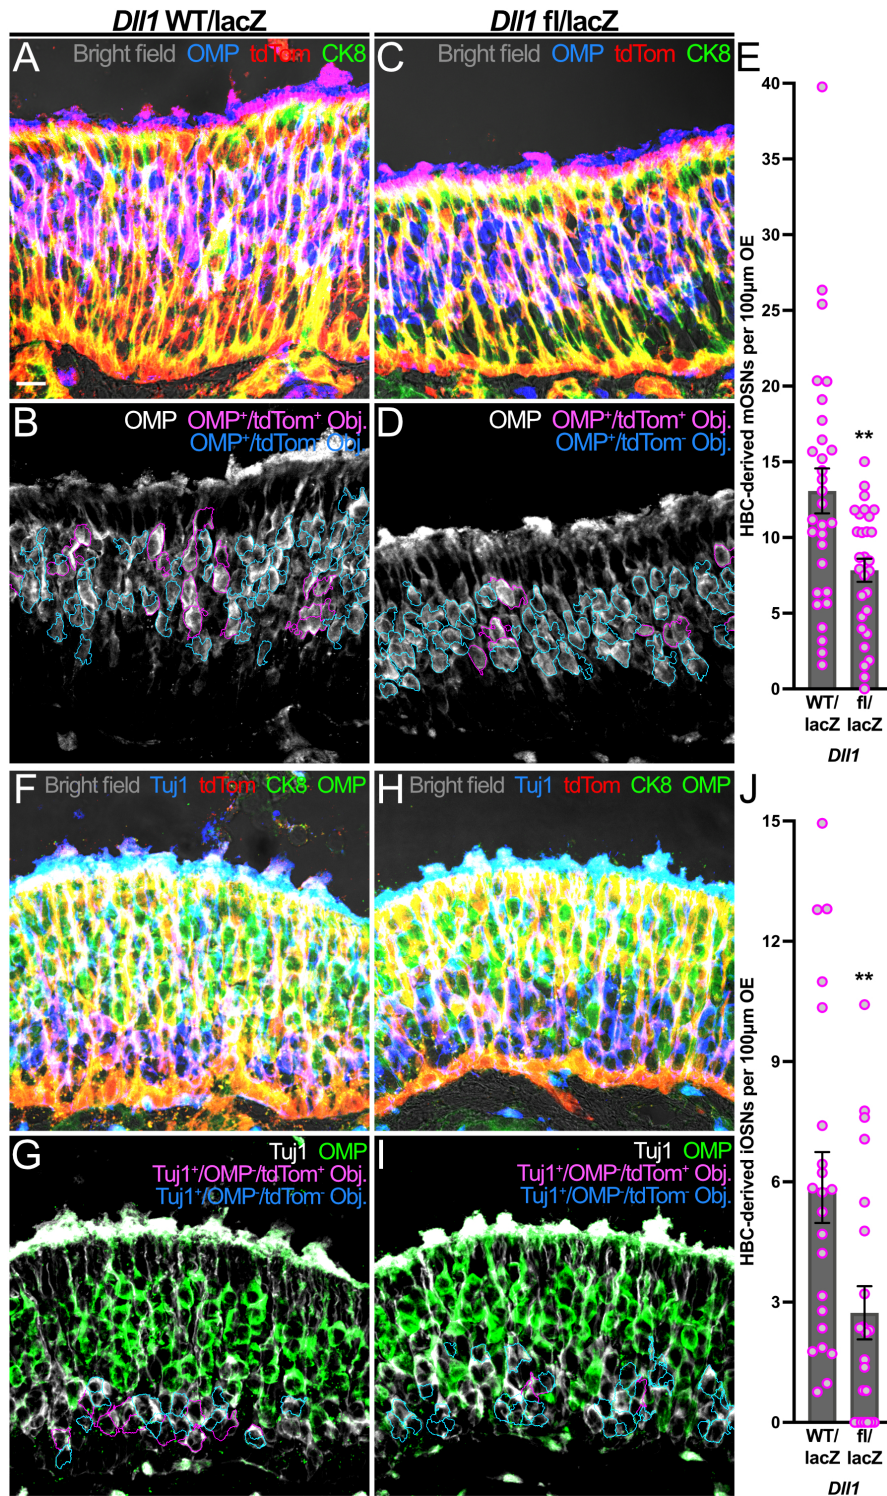

**Fig. S10. HBC differentiation into mOSNs and iOSNs following OE injury is attenuated by complete *Dll1* KO.** A-D: Relative to control (A, B), HBCs give rise to fewer OMP+/tdTom+ mOSNs (magenta in A and C; magenta outlines in B and D) at 28 dpi following complete *Dll1* KO. E: Each circle represents an analyzed Tuj1 region as represented in B and D (n = 3 mice, 30 *Dll1* WT/lacZ regions and 29 *Dll1* fl/lacZ regions). F-I: Relative to control (F, G), HBC differentiation into Tuj1+/OMP+/tdTom+ iOSNs



(magenta in F and H; magenta outlines in G and I) decreases at 28 dpi following complete *Dll1* KO. J: Each circle represents an analyzed region as represented in G and I (n = 3 mice, 22 *Dll1* WT/*lacZ* regions and 22 *Dll1* fl/*lacZ* regions). Error bars indicate mean  $\pm$  s.e.m., Mann-Whitney test, \*\*p<0.01 (E, J). Scale bar equals 10  $\mu$ m (A).

**Table S1. Antibodies used and associated antigen labeling conditions**

| Antibody                  | Source                               | Identifier     | Dilution | Antigen Retrieval | Signal Detection      |
|---------------------------|--------------------------------------|----------------|----------|-------------------|-----------------------|
| Mouse $\alpha$ -p63       | ATCC                                 | Clone 4A4      | 1:100    | Yes               | Secondary fluorophore |
| Rabbit $\alpha$ -Notch1   | Cell Signaling Technology            | 3608           | 1:75     | Yes               | TSA                   |
| Rabbit $\alpha$ -Hes1     | Cell Signaling Technology            | 11988          | 1:50     | Yes               | TSA                   |
| Sheep $\alpha$ -DII1      | R&D Systems                          | AF3970         | 1:20     | No                | TSA                   |
| Chicken $\alpha$ -CK5     | Biolegend                            | Clone Poly9059 | 1:200    | No                | Secondary fluorophore |
| Chicken $\alpha$ -mCherry | Novus                                | NBP2-25158     | 1:100    | No                | Secondary fluorophore |
| Goat $\alpha$ -mCherry    | Scigen                               | AB0040-200     | 1:50     | No                | Secondary fluorophore |
| Rabbit $\alpha$ -Ki67     | Abcam                                | ab15580        | 1:250    | Yes               | Secondary fluorophore |
| Goat $\alpha$ -NeuroD1    | R&D Systems                          | AF2746         | 1:40     | Yes               | TSA                   |
| Rat $\alpha$ -CK8         | Developmental Studies Hybridoma Bank | TROMA-I        | 1:100    | No                | Secondary fluorophore |
| Rabbit $\alpha$ -CK18     | Proteintech                          | 10830-1-AP     | 1:400    | No                | Secondary fluorophore |
| Rat $\alpha$ -Sox2        | Invitrogen                           | 14-9811-82     | 1:200    | Yes               | Secondary fluorophore |
| Rabbit $\alpha$ -PGP9.5   | Proteintech                          | 14730-1-AP     | 1:200    | Yes               | Secondary fluorophore |
| Goat $\alpha$ -IL33       | R&D Systems                          | AF3626         | 1:10     | Yes               | Secondary fluorophore |
| Rabbit $\alpha$ -NICD     | Cell Signaling Technology            | 4147           | 1:25     | Yes               | TSA                   |
| Mouse $\alpha$ -Tuj1      | Biolegend                            | Clone AA10     | 1:75     | Yes               | Secondary fluorophore |
| Goat $\alpha$ -OMP        | Wako Chemicals USA                   | 019-22291      | 1:100    | Yes               | Secondary fluorophore |
